# Supplementary material
Source: HighWire-hosted journal article supplement (https://emj.bmj.com/content/36/10/625)
Supplement: inline-supplementary-material-6 [file inline-supplementary-material-6.pdf]

**Survey response results for primary care service provision in or alongside emergency departments in England and Wales in 2017-18**

|                                                                                                                                                                                                                                                                                                                                                      |                                                                                                                                                       |
|------------------------------------------------------------------------------------------------------------------------------------------------------------------------------------------------------------------------------------------------------------------------------------------------------------------------------------------------------|-------------------------------------------------------------------------------------------------------------------------------------------------------|
| Out-of-hours (OOH) service on the hospital site                                                                                                                                                                                                                                                                                                      | n= 65/77, 84%                                                                                                                                         |
| Associated with the emergency department <ul style="list-style-type: none"> <li>• working alongside emergency clinicians in one service</li> <li>• adjacent to the department</li> <li>• within the department but in a separate unit</li> <li>• other or combination of models</li> </ul>                                                           | n= 53/77, 69% <ul style="list-style-type: none"> <li>• n=21/53, 40%</li> <li>• n=13/53, 24%</li> <li>• n=12/53, 23%</li> <li>• n=7/53, 13%</li> </ul> |
| Patient groups seen by primary care services associated with emergency departments <ul style="list-style-type: none"> <li>• primary care problems</li> <li>• low acuity problems including minor trauma</li> <li>• redirecting patients out of the department</li> <li>• undifferentiated patients, same case mix as emergency clinicians</li> </ul> | <ul style="list-style-type: none"> <li>• n=48/53, 91%</li> <li>• n=26/53, 49%</li> <li>• n=9/53, 17%</li> <li>• n=6/53, 12%</li> </ul>                |
